# Supplementary material for: Selective determination of semi-volatile thiophene compounds in water by molecularly imprinted polymer thin films with direct headspace gas chromatography sulfur chemiluminescence detection
Source: Royal Society of Chemistry journal article supplement (doi:10.1039/c7an01686g), 2018-01-01
Supplement: c7an01686g1.pdf [file c7an01686g1.pdf]

## Supplementary Information

### Selective determination of semi-volatile thiophene compounds in water by molecularly imprinted polymer thin-films with direct headspace gas chromatography sulfur chemiluminescence detection

Hassan. Y. Hijazi, Christina. S. Bottaro\*

This supporting information gives a detailed description of the rebinding experiments, SEM images and photo of the polymer thin-film, and selectivity of MIP thin-film for thiophene compounds.

#### Selectivity experiments

In the rebinding experiments, each MIP slide was placed in a 100-mL beaker containing 40 mL of water spiked with a mixture of thiophene compounds at a concentration of  $100 \mu\text{g L}^{-1}$  each for uploading and was stirred for 2 h at room temperature. Stock spiking solutions of thiophene compounds were prepared in acetonitrile and stored in the refrigerator at  $4 \text{ }^\circ\text{C}$  when not in use. Working solutions were prepared daily by appropriate dilution of the spiking solutions with distilled water. The binding capacity of polymer  $Q_t$  ( $\mu\text{g g}^{-1}$ ) for each analyte at time  $t$  was calculated using the following equation:

$$Q_t = \frac{m_{\text{analyte}}}{m_{\text{film}}} \quad (\text{S1.1})$$

where  $m_{\text{analyte}}$  ( $\mu\text{g}$ ) is the mass of adsorbed thiophene compound into the polymer film and  $m_{\text{film}}$  (g) is the mass of the polymer film. The imprinting factor ( $IF$ ) values for all thiophene compounds were calculated as follow,

$$IF = \frac{Q_{\text{MIP}}}{Q_{\text{NIP}}} \quad (\text{S1.2})$$

Where  $Q_{\text{MIP}}$  ( $\mu\text{g g}^{-1}$ ) is the binding capacity of MIP and  $Q_{\text{NIP}}$  ( $\mu\text{g g}^{-1}$ ) is the binding capacity of NIP.

**Table S1.** Percent recovery values of thiophene compounds obtained from the analysis of small and large volumes of DI water and seawater spiked at the same concentration ( $50 \mu\text{g L}^{-1}$ ) using MIP thin-film for two hours followed by HS-GC-SCD analysis.

| Sample volume (mL)                        | Mass of analyte recovered (ng) |               |               |               |               |               |               |               |              |              |
|-------------------------------------------|--------------------------------|---------------|---------------|---------------|---------------|---------------|---------------|---------------|--------------|--------------|
|                                           | (RSD%)                         |               |               |               |               |               |               |               |              |              |
|                                           | BT                             |               | 3-MBT         |               | DBT           |               | 4-MDBT        |               | 4,6-DMDBT    |              |
|                                           | DI                             | SW            | DI            | SW            | DI            | SW            | DI            | SW            | DI           | SW           |
| 10                                        | 201<br>(1.5)                   | 194<br>(2.8)  | 168<br>(0.7)  | 149<br>(1.9)  | 253<br>(1.0)  | 286<br>(3.2)  | 197<br>(0.6)  | 207<br>(2.6)  | 115<br>(1.0) | 107<br>(2.9) |
| Matrix Effect<br>(% of DI water recovery) | 97                             |               | 89            |               | 97            |               | 98            |               | 94           |              |
| 800                                       | 1861<br>(2.0)                  | 1758<br>(1.7) | 1617<br>(6.0) | 1467<br>(6.4) | 1841<br>(5.0) | 1622<br>(5.4) | 1473<br>(2.9) | 1263<br>(2.6) | 989<br>(4.1) | 673<br>(5.7) |
| Matrix Effect<br>(% of DI water recovery) | 94                             |               | 93            |               | 89            |               | 86            |               | 68           |              |

### Characterization of polymer thin-films

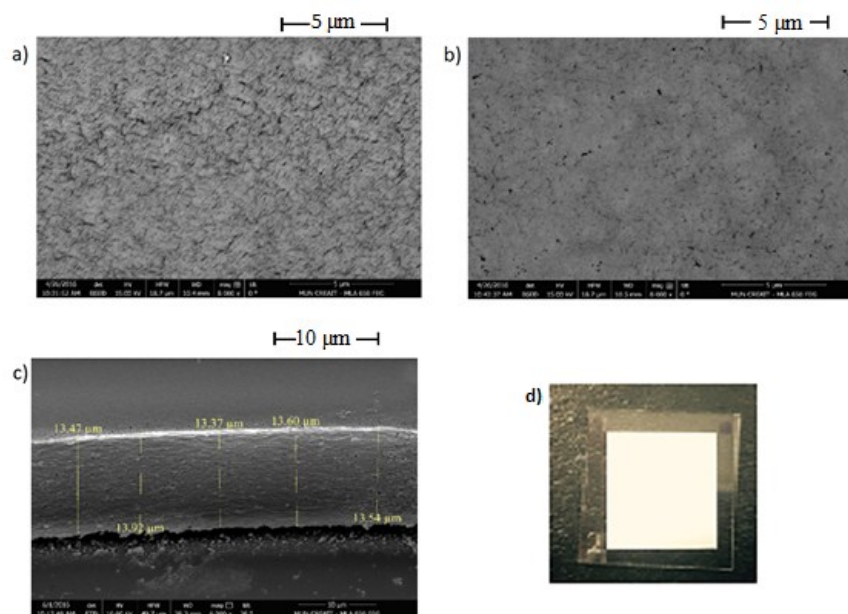

**Figure S1.** a) SEM image of the MIP film surface, b) SEM image of NIP films, c) SEM image of cross-section of MIP film, and d) MIP coated slide.

## Selectivity of MIP thin-film for thiophene compounds

**Table S2.** Log  $K_{ow}$  of targeted thiophene compounds.

| Compound                                  | Log $K_{ow}$ |
|-------------------------------------------|--------------|
| Benzothiophene (BT)                       | 3.12         |
| 3-Methylbenzothiophene (3-MBT)            | 3.71         |
| Dibenzothiophene (DBT)                    | 4.38         |
| 4,6-Dimethyl-dibenzothiophene (4,6-DMDBT) | 5.50         |

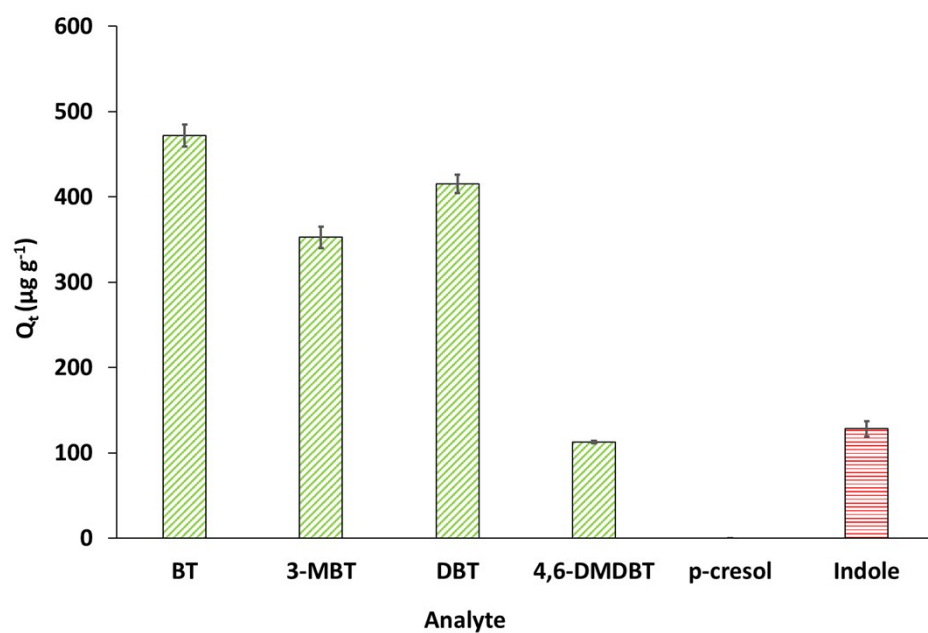

**Figure S2.** Selectivity of MIP thin-film for thiophene compounds versus p-cresol and indole ( $n=3$ ). Error bars represent standard deviation.
